# Supplementary material
Source: Elsevier journal article supplement (https://www.sciencedirect.com/science/article/pii/S0325754117301347)

## Supplementary Material I. Oligonucleotides used in this study

| Oligonucleotides | Sequence (5'-3')          |
|------------------|---------------------------|
| L100074*         | CCCTAGCTGGACGTGGAATC      |
| L100075*         | GCCCCGAGAAAGTCTTGTGC      |
| L100078          | GGGCAACGTACTCGTCCAGGCGA   |
| L100079          | GGGGGTCTCGAACGCTTGCG      |
| L100063phtM      | GCTGGTCCCGCGCCTCATGG      |
| L100143phtMF/med | TGCAGGTGTTTAACGCCTTAATTCA |
| L100144phtMR/med | CATTACTCAGTAAGTAGCCCATATA |
| L100145phtMF5A'  | CGATGCCTTTCAGATCAGCTTTGCA |
| L100146phtMR5a'  | ACTTCCTTGAATTAAGGCGTTAAAC |
| L100148phtMR3A'  | GACCTGAAGCGATAACCGGAACACA |
| L100147phtMF3A'  | GGAAGTTATATGGGCTACTTACTGA |

\* Oligonucleotides sequences previously reported by Arvizu-Gómez *et al.*, 2011

## Supplementary material II

**Competition assays to delimit the binding site of the putative regulatory proteins of the *phtM* operon.** Gel shift competition assays using different fragments of the upstream region of the *phtM* operon as competitors of the labelled  $P_{phtM}$  fragment (a). The competitors was used in increasing concentrations: 50 ng, 60 ng, 100 ng, 150 ng, 200 ng, 250 ng, 300 ng and/or 400 ng. The letters indicate the fragments of the upstream region of the *phtM* operon used as competitors in the assays. Only the fragments d, f, g were unable to compete the DNA-protein complexes.

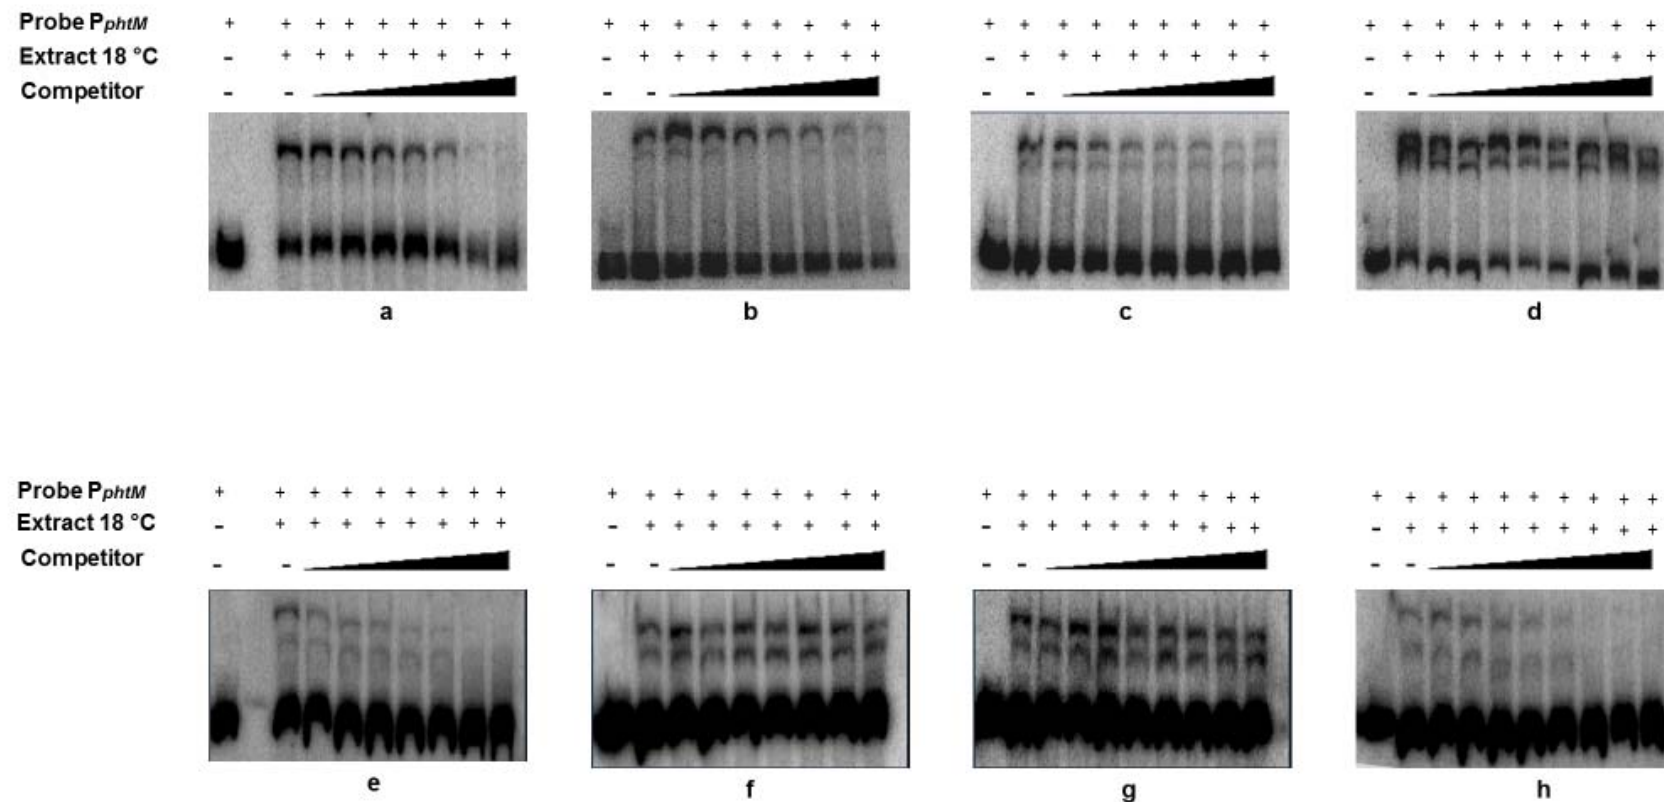

Supplement: mmc1 [file S0325754117301347:mmc1.pdf]
